# Supplementary material
Source: PubMed Central journal article supplement (PMC4405506)
Supplement: 12263_2015_463_MOESM1_ESM.pdf [file 12263_2015_463_MOESM1_ESM.pdf]

### Online resource 1

Differential effects of basolateral and apical iron supply on iron transport in Caco-2 cells  
Eady JJ, Wormstone YM, Heaton SJ, Hilhorst B and Elliott RM

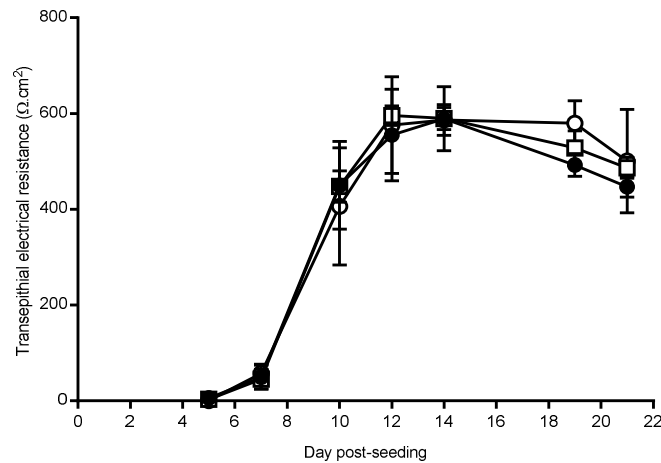

Effects of different forms of iron, supplied to Caco-2 cell monolayers via either the apical or basolateral surface, on transepithelial electrical resistance (TEER) of the cell layer. Values indicate background corrected TEER values determined for Caco-2 cell monolayers established over two weeks (days 1-13 following seeding) in bicameral chambers before being swapped for one further week (days 14-21 following cell seeding) into medium prepared with metal depleted fetal bovine serum (FBS) only (black circles), medium prepared with metal depleted FBS plus 30  $\mu\text{M}$  holo-Tf added to the medium only on the basolateral side of the cells (open circles) or medium prepared with metal depleted FBS plus 10  $\mu\text{M}$  ferric NTA added to the medium only on the apical side of the cells (open squares). The medium was refreshed every 2 to 3 days. Error bars indicate mean values  $\pm$  standard deviation ( $n = 8$  comprised of measurements from 2 replicate wells for each treatment from each of 4 separate plates set up in parallel). Data were compared by two way ANOVA. The results of this analysis indicated that there was a significant change in TEER values over time ( $p < 0.0001$ ) but no significant effects of the treatments and no significant interaction between treatment and time.
