# Supplementary material
Source: PubMed Central journal article supplement (PMC4405506)
Supplement: 12263_2015_463_MOESM3_ESM.pdf [file 12263_2015_463_MOESM3_ESM.pdf]

### Online resource 3

Differential effects of basolateral and apical iron supply on iron transport in Caco-2 cells

Eady JJ, Wormstone YM, Heaton SJ, Hilhorst B and Elliott RM

### Outputs of functional annotation enrichment analysis performed with the DAVID Bioinformatic Resources 6.7

#### (A) Comparison of basolateral holo-Tf treatment versus control

| Category        | Term                                       | Count | %     | P Value  | List Total | Pop Hits | Pop Total | Fold Enrichment | FDR      |
|-----------------|--------------------------------------------|-------|-------|----------|------------|----------|-----------|-----------------|----------|
| SP_PIR_KEYWORDS | phosphoprotein                             | 275   | 47.83 | 6.95E-08 | 565        | 7263     | 19235     | 1.29            | 9.88E-05 |
| GOTERM_BP_FAT   | GO:0046486~glycerolipid metabolic process  | 19    | 3.30  | 2.49E-06 | 417        | 162      | 13528     | 3.80            | 0.004348 |
| GOTERM_BP_FAT   | GO:0008610~lipid biosynthetic process      | 26    | 4.52  | 2.21E-05 | 417        | 323      | 13528     | 2.61            | 0.038609 |
| GOTERM_BP_FAT   | GO:0006641~triglyceride metabolic process  | 9     | 1.57  | 4.21E-05 | 417        | 43       | 13528     | 6.79            | 0.07355  |
| GOTERM_BP_FAT   | GO:0006644~phospholipid metabolic process  | 18    | 3.13  | 8.00E-05 | 417        | 190      | 13528     | 3.07            | 0.139633 |
| SP_PIR_KEYWORDS | disease mutation                           | 74    | 12.87 | 8.41E-05 | 565        | 1591     | 19235     | 1.58            | 0.119619 |
| GOTERM_BP_FAT   | GO:0006639~acylglycerol metabolic process  | 9     | 1.57  | 1.12E-04 | 417        | 49       | 13528     | 5.96            | 0.194572 |
| GOTERM_BP_FAT   | GO:0006638~neutral lipid metabolic process | 9     | 1.57  | 1.29E-04 | 417        | 50       | 13528     | 5.84            | 0.225467 |

#### (B) Comparison of apical ferric nitrilotriacetate treatment versus control

| Category        | Term                                     | Count | %    | P Value  | List Total | Pop Hits | Pop Total | Fold Enrichment | FDR      |
|-----------------|------------------------------------------|-------|------|----------|------------|----------|-----------|-----------------|----------|
| SP_PIR_KEYWORDS | phosphoprotein                           | 213   | 51.0 | 2.69E-09 | 409        | 7263     | 19235     | 1.379216        | 3.69E-06 |
| GOTERM_CC_FAT   | GO:0043233~organelle lumen               | 70    | 16.7 | 1.52E-07 | 263        | 1820     | 12782     | 1.86926         | 2.04E-04 |
| GOTERM_CC_FAT   | GO:0070013~intracellular organelle lumen | 68    | 16.3 | 3.16E-07 | 263        | 1779     | 12782     | 1.857702        | 4.24E-04 |
| GOTERM_CC_FAT   | GO:0031974~membrane-enclosed lumen       | 70    | 16.7 | 3.23E-07 | 263        | 1856     | 12782     | 1.833003        | 4.34E-04 |
| GOTERM_CC_FAT   | GO:0044451~nucleoplasm part              | 31    | 7.4  | 1.17E-06 | 263        | 555      | 12782     | 2.714637        | 0.00157  |
| GOTERM_CC_FAT   | GO:0031981~nuclear lumen                 | 57    | 13.6 | 1.81E-06 | 263        | 1450     | 12782     | 1.910513        | 0.002427 |
| GOTERM_CC_FAT   | GO:0016604~nuclear body                  | 15    | 3.6  | 9.20E-06 | 263        | 168      | 12782     | 4.339354        | 0.012356 |
| SP_PIR_KEYWORDS | acetylation                              | 88    | 21.1 | 1.34E-05 | 409        | 2635     | 19235     | 1.570619        | 0.018417 |
| GOTERM_CC_FAT   | GO:0005654~nucleoplasm                   | 38    | 9.1  | 2.40E-05 | 263        | 882      | 12782     | 2.09391         | 0.032218 |
| GOTERM_CC_FAT   | GO:0016607~nuclear speck                 | 11    | 2.6  | 4.87E-05 | 263        | 103      | 12782     | 5.190372        | 0.06545  |
| SP_PIR_KEYWORDS | nucleus                                  | 124   | 29.7 | 1.14E-04 | 409        | 4283     | 19235     | 1.361578        | 0.156603 |
